# Supplementary material
Source: PubMed Central journal article supplement (PMC2956745)
Supplement: NIHMS210231-supplement-01.pdf [file NIHMS210231-supplement-01.pdf]

## Supplementary Material

### Pharmacodynamics of PEG-IFN alpha-2a in HIV/HCV co-infected patients: Implications for treatment outcomes

Harel Dahari<sup>1\*</sup>, Evaldo S. Affonso de Araujo<sup>2</sup>, Bart L. Haagmans<sup>3</sup>, Thomas J. Layden<sup>1</sup>, Scott J. Cotler<sup>1</sup>, Antonio A. Barone<sup>2</sup>, Avidan U. Neumann<sup>4</sup>

<sup>1</sup>Department of Medicine, University of Illinois at Chicago, Chicago, IL 60612, USA. <sup>2</sup>Infectious Diseases Department-LIM47, University of São Paulo Hospital das Clínicas, São Paulo, Brazil, <sup>3</sup>Department of Virology, Erasmus Medical Center, Rotterdam, The Netherlands, <sup>4</sup>Bar Ilan University, Life Sciences Faculty, Ramat Gan, Israel

\*To whom correspondence should be addressed. Email: [daharih@uic.edu](mailto:daharih@uic.edu)

#### Pharmacodynamic model that includes proliferation of uninfected and infected cells

We used a model [1-3] of HCV infection - that predicts various viral decline patterns such as, biphasic, triphasic and flat partial response - to fit patients' data. The equations describing the dynamics of HCV infection and treatment in this model involve uninfected hepatocytes ( $T$ ), infected hepatocytes ( $I$ ) and virus ( $V$ ). Uninfected and infected hepatocytes can proliferate with maximum proliferation rates  $r_T$  and  $r_I$ , respectively, under the control of a homeostatic process in which proliferation shuts down as the total number of susceptible hepatocytes, irrespective of whether they are infected or not, approaches a maximum number  $T_{max}$  [4]. Uninfected hepatocytes are also produced by differentiation from precursors at a constant rate  $s$  [5], die at rate  $d_T$  per cell and are infected with rate constant  $\beta$ . HCV is produced at rate  $p$  per infected cell. PEG-IFN  $\alpha$ -2a is assumed to act by partially blocking virion production, with effectiveness  $\varepsilon(t)$  (see Eq. 4 in the main text). We assume that ribavirin effectiveness  $\eta(t) = \eta_{max}(1 - \exp(-t/t_a))$ , where  $t_a = 5.6$  days and  $\eta_{max} = 0.5$ , based on the following observations: (i) it takes approximately 4 weeks for ribavirin to reach its steady-state concentration in serum [6], (ii) ribavirin

does not affect the first viral drop in combination with interferon- $\alpha$  [6, 7], and (iii) ribavirin major mode of action is suggested to reducing the rate of infection [2, 8] (see also [9]). Thus,  $0 \leq \varepsilon(t) \leq 1$  and  $0 \leq \eta(t) \leq 0.5$ ; with 0.5 or 1 meaning 50% or 100% effectiveness, respectively. The corresponding system of differential equations is

$$\begin{aligned} \frac{dT}{dt} &= s + r_T T \left(1 - \frac{T+I}{T_{\max}}\right) - d_T T - (1 - \eta(t)) \beta VT \\ \frac{dI}{dt} &= (1 - \eta(t)) \beta VT + r_I I \left(1 - \frac{T+I}{T_{\max}}\right) - \delta I \\ \frac{dV}{dt} &= (1 - \varepsilon(t)) pI - cV . \end{aligned} \quad (\text{Eq. S1})$$

The model's steady states at baseline and the baseline fraction of hepatocytes that are HCV-infected with respect to all susceptible hepatocytes,  $\pi$ , are given in the Additional File of <sup>[1]</sup>.

### **Biphasic-pharmacodynamic model**

To fit patients' data in whom a biphasic HCV RNA decline pattern was observed (as explained in Methods in the main text), we used our previously published model [10] of HCV kinetics that allows the estimation of treatment effectiveness, viral clearance and infected cell loss. The solution of our model predicts the evolution of HCV RNA over time,  $V(t)$ , as:

$$V(t) = V_0 (A e^{-\lambda_1(t-t_0)} + (1-A) e^{-\lambda_2(t-t_0)}) \quad (\text{Eq. S2})$$

where

$$\lambda_{1,2} = \frac{1}{2} (c + \delta \pm \sqrt{(c - \delta)^2 + 4(1 - \varepsilon(t))(1 - \eta(t))c\delta}) \quad \text{and} \quad A = \frac{\varepsilon(t)c - \lambda_2}{\lambda_1 - \lambda_2} .$$

Equation (S2) predicts that the viral load under treatment will always decrease to the uninfected steady state following an initial rapid viral decline (first phase) followed by a slower decay (second phase), with rates  $\lambda_1$  and  $\lambda_2$ , respectively. The parameter  $t_0$  is a delay, corresponding to the time it takes between the initiation of drug treatment and its effect in reducing HCV RNA. The solution is valid for  $t > t_0$ . For  $t < t_0$ , the solution is  $V(t) = V_0$ , where  $V_0$  is the baseline HCV RNA.  $\varepsilon(t)$  and  $\eta(t)$ ,  $c$  and  $\delta$  are as explained above for Eq. S1.

### **Fitting equation S1 to the experimental data**

The parameters  $t_0$ ,  $V_0$ , and  $c$  (for each patient) were estimated by equation 4 given in Neumann et al.[10] as explained in the main text. In addition, as previously described[1], we fixed  $r_T = 3 \text{ day}^{-1}$ ,  $T_{max} = 7.5 \times 10^6 \text{ cell/ml}$ ,  $d_T = 3.5 \times 10^{-3} \text{ day}^{-1}$  and  $s = 1 \text{ cell/day/ml}$ . The remaining parameters  $\delta$ ,  $r_I$ ,  $p$ ,  $Ec_{50}$ , and  $\beta$  were estimated for each patient (Table S1), using Berkeley Madonna (<http://www.berkeleymadonna.com>). As previously described [1], we let  $\delta$ ,  $r_I$ ,  $p$ , and  $\beta$  to be estimated within the following parameter space:  $0.2 \leq r_I \leq 3.0 \text{ day}^{-1}$ ,  $1 \leq p \leq 15 \text{ day}^{-1}$ ,  $d_T \leq \delta \leq 3 \text{ day}^{-1}$ ;  $10^{-8} \leq \beta \leq 10^{-6} \text{ ml/day/virions}$ . Fitting results for the first 5 weeks of treatment are shown in Fig. S1.

### **Baseline characteristics and viral kinetics of the *discontinued* patients**

Five patients have discontinued therapy after 11 or 12 weeks (three asked to leave, one went to jail, and one died for a cause not related to the study). Their baseline characteristics and viral kinetics are shown in Table S2 and Fig. S2, respectively.

**Table S1. Parameter estimates obtained by fitting equation S1 to patients' data.**

| Patient No.         | $r_I$            | $\beta$              | $\delta$           | $p$                   | $n$              | $\pi$          | $EC_{50}$        | $\varepsilon_{7max}$ | $\varepsilon_{max}$  |
|---------------------|------------------|----------------------|--------------------|-----------------------|------------------|----------------|------------------|----------------------|----------------------|
| 1*                  | 0.96             | 9.9                  | 0.34               | 0.90                  | 1.0              | 86%            | 0.19             | 0.974                | 0.985                |
| 2*                  | 3.00             | 1.7                  | 0.18               | 0.80                  | 2.6              | 39%            | 2.60             | 0.953                | 0.993                |
| 3* <sup>@</sup>     |                  |                      |                    |                       |                  |                |                  |                      |                      |
| 6*                  | 2.97             | 1.8                  | 0.14               | 0.60                  | 2.0              | 13%            | 0.67             | 0.987                | 0.996                |
| 7*                  | 2.97             | 1.9                  | 0.46               | 1.97                  | 1.0              | 13%            | 6.90             | 0.632                | 0.676                |
| 4*                  | 0.51             | 2.6                  | 0.27               | 4.10                  | 1.0              | 99%            | 1.97             | 0.908                | 0.925                |
| 5*                  | 0.57             | 3.4                  | 0.30               | 7.40                  | 1.2              | 95%            | 0.66             | 0.975                | 0.983                |
| <b>Median (IQR)</b> | <b>2.0 (2.4)</b> | <b>2.3 (3.3)</b>     | <b>0.29 (0.20)</b> | <b>1.4 (4.8)</b>      | <b>1.1 (1.2)</b> | <b>63 (83)</b> | <b>1.3 (3.1)</b> | <b>0.964 (0.140)</b> | <b>0.984 (0.130)</b> |
| 8                   | 2.97             | 3.9                  | 0.18               | 0.38                  | 1.0              | 86%            | 1.08             | 0.856                | 0.911                |
| 9                   | 2.97             | 0.3                  | 0.26               | 6.20                  | 1.0              | 16%            | 1.70             | 0.868                | 0.884                |
| 13                  | 1.38             | 9.9                  | 0.26               | 1.00                  | 1.0              | 99%            | 1.40             | 0.917                | 0.935                |
| 10                  | 0.51             | 0.2                  | 0.07               | 2.95                  | 1.0              | 6%             | 5.71             | 0.672                | 0.759                |
| 11                  | 0.00             | 1.6                  | 0.11               | 0.70                  | 2.0              | 45%            | 2.90             | 0.938                | 0.972                |
| 12                  | 0.63             | 1.0                  | 0.10               | 1.20                  | 1.0              | 13%            | 21.46            | 0.380                | 0.480                |
| 14                  | 1.26             | 0.9 <sup>&amp;</sup> | 0.11               | 2.60 <sup>&amp;</sup> | 1.0              | 99%            | 13.40            | 0.469                | 0.624                |
| 15 <sup>@</sup>     |                  |                      |                    |                       |                  |                |                  |                      |                      |
| 16                  | 2.22             | 0.7                  | 0.11               | 0.89                  | 1.0              | 98%            | 0.78             | 0.946                | 0.961                |
| 17                  | 2.67             | 0.5                  | 0.11               | 3.10                  | 1.0              | 98%            | 2.27             | 0.856                | 0.892                |
| 18**                | NF               | NF                   | NF                 | NF                    | NF               | NF             | NF               | NF                   | NF                   |
| 19**                | NF               | NF                   | NF                 | NF                    | NF               | NF             | NF               | NF                   | NF                   |
| 20                  | 0.75             | 1.1                  | 0.15               | 5.20                  | 1.0              | 99%            | 3.60             | 0.757                | 0.841                |
| 21**                | NF               | NF                   | NF                 | NF                    | NF               | NF             | NF               | NF                   | NF                   |
| <b>Median (IQR)</b> | <b>1.3 (2.1)</b> | <b>1.0 (1.7)</b>     | <b>0.11 (0.09)</b> | <b>1.9 (2.8)</b>      | <b>1.0 (0.2)</b> | <b>92 (84)</b> | <b>2.6 (6.3)</b> | <b>0.856 (0.300)</b> | <b>0.888 (0.220)</b> |
| <b>P value</b>      | <b>NS</b>        | <b>0.034</b>         | <b>0.01</b>        | <b>NS</b>             | <b>NS</b>        | <b>NS</b>      | <b>NS</b>        | <b>0.039</b>         | <b>0.039</b>         |

$\beta$ , viral infection rate [ $10^{-7}$  mL/virions/day];  $r_I$ , HCV-infected cell proliferation rate constant [1/day];  $p$ , viral production rate constant [virions/cell/day];  $EC_{50}$ , PEG-IFN concentration that decreases HCV production by 50%;  $n$ , Hill coefficient;  $\varepsilon_{7max}$ , maximum effectiveness during first dose of PEG-IFN;  $\varepsilon_{max}$ , 4 to 12-week PEG-IFN effectiveness.  $\pi$ , estimated baseline percentage of hepatocytes that are HCV-infected;  $\pi = \bar{I} / (\bar{I} + \bar{T})$ , where an over bar denotes a baseline value (see Additional File of our recent publication[1]).  $V_0$ ,  $c$ , and  $t_0$  values for each patient are shown in Table 3 in the main text.

<sup>&</sup>, these parameter values were fixed during fit to allow model convergence. NF, model cannot not be fitted to the data. NA, in these patients PEG-IFN concentration declined from day 15 (see Fig. 2 in main text). <sup>@</sup>, in these patients PEG-IFN concentration dropped from day 15, thus parameter estimates were not performed with Eq. S1 but with Eq. S2 (see Table 3 in the main text).

**Figure S1.** PEG-IFN- $\alpha$ -2a serum concentrations and HCV-RNA levels during the first five weeks of treatment in **(A)** SVRs and **(B)** non-SVRs. Graphs show drug concentration data (circles) and best-fit theoretical curve (Eq. 3 (see main text), dashed line; right axis, ng/ml) and HCV RNA data (squares) and best-fit curve (solid line) (left axis,  $\log_{10}$  IU/mL) from our combined triphasic or biphasic pharmacodynamic models (Eqs. S1 or S2, respectively; see also Table 3 in the main text). Estimated  $EC_{50}$  is represented by horizontal dotted-dashed line.

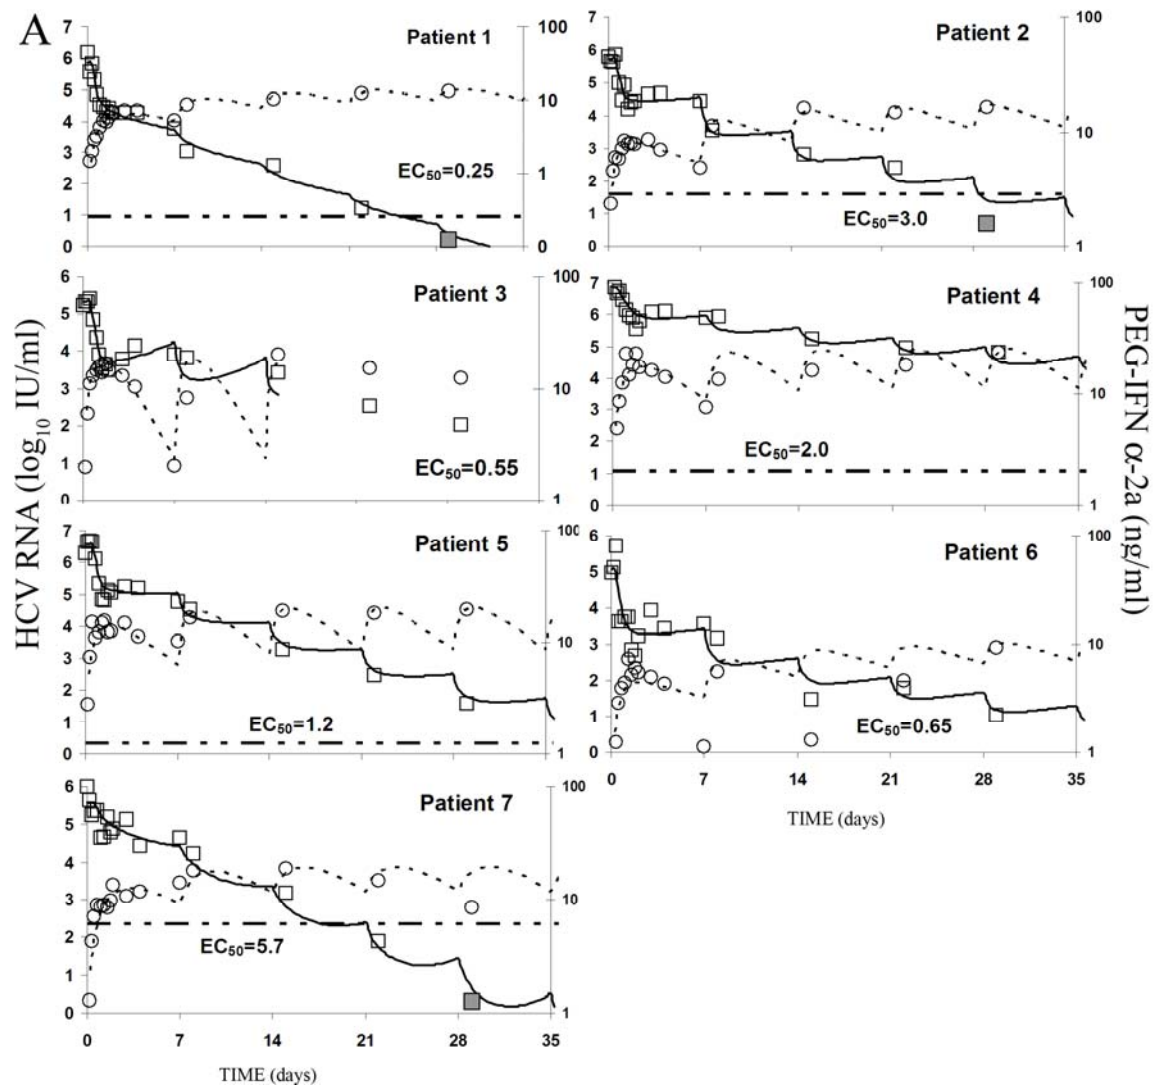

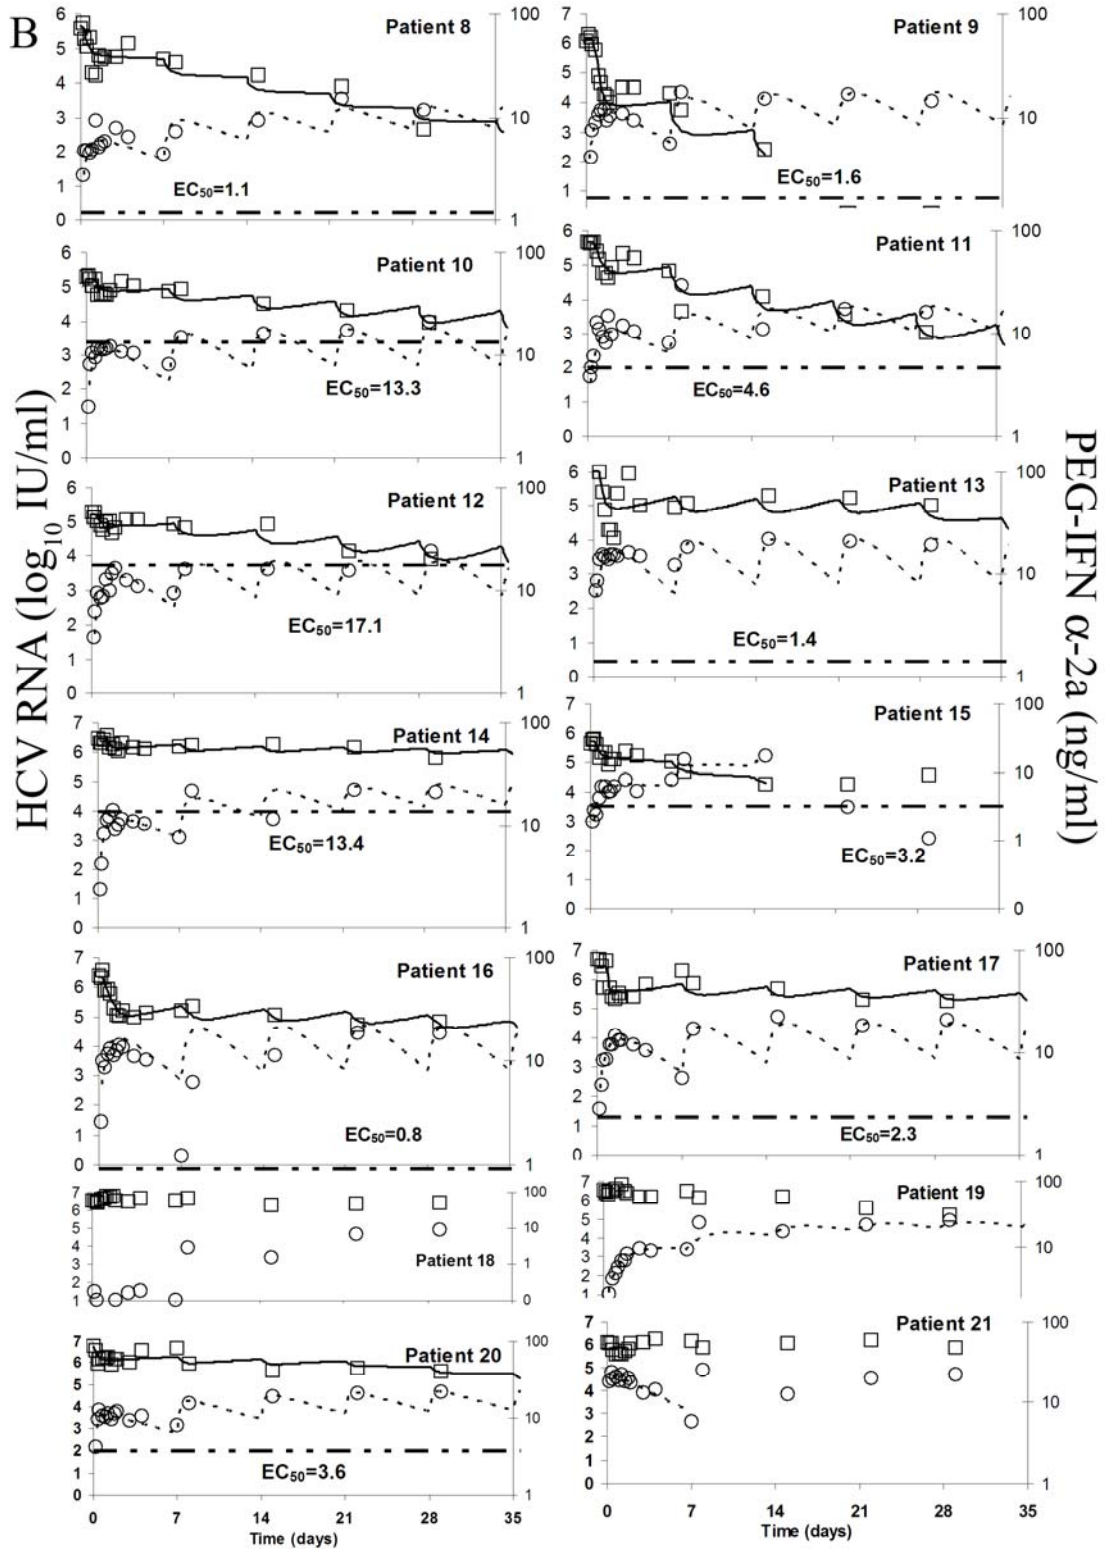

**Table S2.** Baseline Characteristics of the *discontinued* patients.

| Patient No. | Genotype | race | Age (yr) | gender | Weight (kg) | CD4 (cells/m <sup>3</sup> ) | Metavir |
|-------------|----------|------|----------|--------|-------------|-----------------------------|---------|
| 22          | 1        | W    | 38       | M      | 71          | 486                         | F1A1    |
| 23          | 1        | B    | 47       | M      | 78          | 524                         | F1A1    |
| 24          | 3        | B    | 39       | M      | 67          | 455                         | F4A3    |
| 25          | 3        | W    | 49       | M      | 71          | 424                         | F2A3    |
| 26          | 3        | B    | 34       | M      | 65          | 658                         | F1A1    |

W, white; B, black; M, male.

**Figure S2.** HCV RNA levels during 12 weeks of treatment. Gray squares indicate undetectable HCV RNA (<10 IU/ml). Solid lines were used to emphasize phases of viral decline.

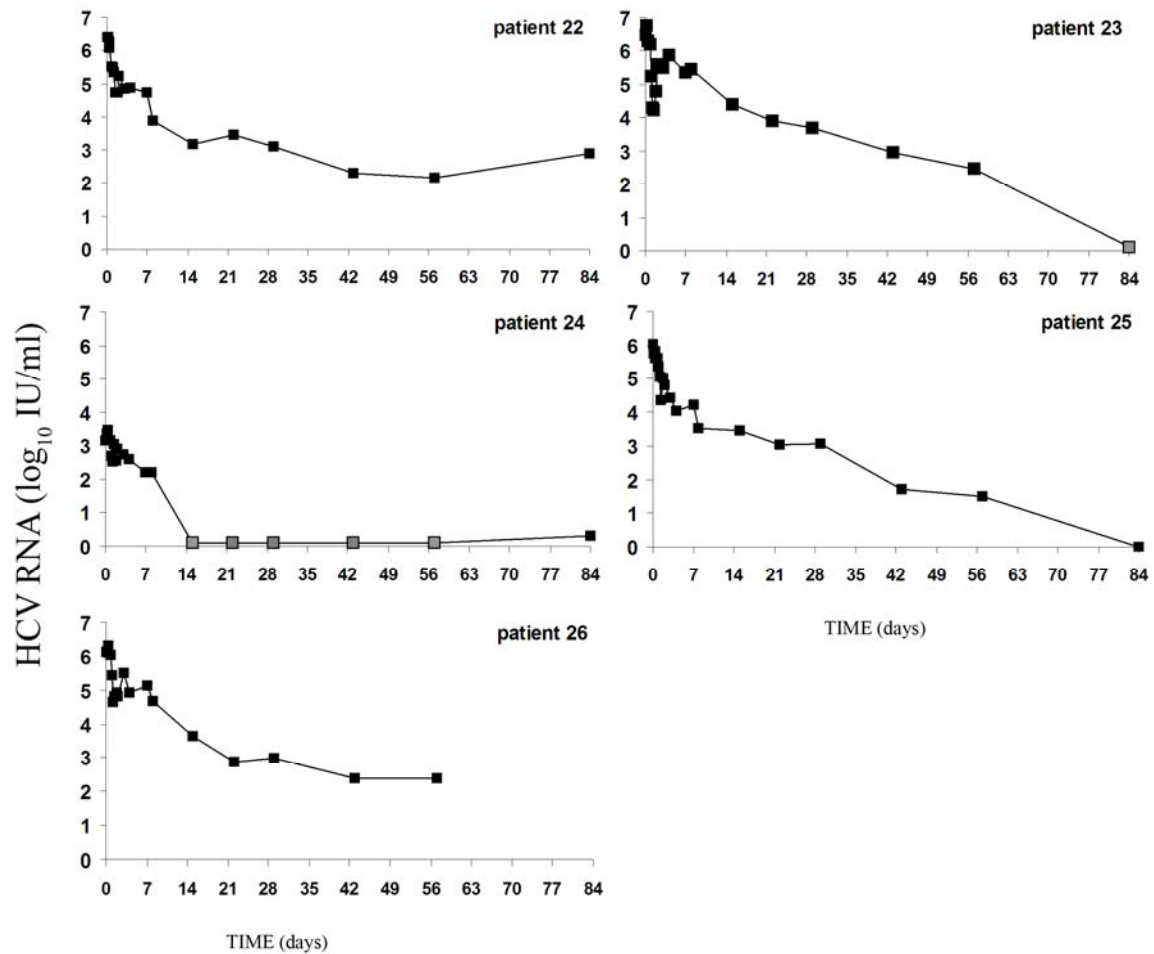

## References

- [1] Dahari H, Shudo E, Cotler SJ, Layden TJ, Perelson AS. Modelling hepatitis C virus kinetics: the relationship between the infected cell loss rate and the final slope of viral decay. *Antiviral Therapy* 2009;14(3):459-464.
- [2] Dahari H, Ribeiro RM, Perelson AS. Triphasic decline of hepatitis C virus RNA during antiviral therapy. *Hepatology* 2007;46:16-21.
- [3] Reluga TC, Dahari H, Perelson AS. Analysis of Hepatitis C Virus Infection Models with Hepatocyte Homeostasis. *SIAM J Appl Math.* 2009;69:999-1023.
- [4] Dahari H, Major M, Zhang X, Mihalik K, Rice CM, Perelson AS, et al. Mathematical modeling of primary hepatitis C infection: Noncytolytic clearance and early blockage of virion production. *Gastroenterology* 2005;128:1056-1066.
- [5] Theise ND, Nimmakayalu M, Gardner R, Illei PB, Morgan G, Teperman L, et al. Liver from bone marrow in humans. *Hepatology* 2000;32:11-16.
- [6] Pawlotsky JM, Dahari H, Neumann AU, Hezode C, Germanidis G, Lonjon I, et al. Antiviral action of ribavirin in chronic hepatitis C. *Gastroenterology* 2004;126:703-714.
- [7] Dahari H, Shudo E, Ribeiro RM, Perelson AS. Mathematical modeling of HCV infection and treatment. *Methods Mol Biol.* 2009;510:439-453.
- [8] Dixit NM, Layden-Almer JE, Layden TJ, Perelson AS. Modelling how ribavirin improves interferon response rates in hepatitis C virus infection. *Nature* 2004;432:922-924.
- [9] Perelson AS, Layden TJ. Ribavirin: is it a mutagen for hepatitis C virus? *Gastroenterology.* 2007;132:2050-2052.
- [10] Neumann AU, Lam NP, Dahari H, Gretch DR, Wiley TE, Layden TJ, et al. Hepatitis C viral dynamics in vivo and the antiviral efficacy of interferon-alpha therapy. *Science* 1998;282:103-107.
